# Supplementary material
Source: PubMed Central journal article supplement (PMC2890176)
Supplement: blood-2010-01-266775_1.pdf [file blood-2010-01-266775_1.pdf]

| <b>Characteristics</b> | <b>Control<br/>n (%)</b> | <b>Case<br/>n (%)</b> |
|------------------------|--------------------------|-----------------------|
| <b>Sex</b>             |                          |                       |
| Male                   | 291 (52.4)               | 329 (53.9)            |
| Female                 | 264 (47.6)               | 281 (46.1)            |
| <b>Age</b>             |                          |                       |
| <45                    | 73 (13.2)                | 99 (16.2)             |
| 45-64                  | 226 (40.7)               | 292 (47.9)            |
| 65+                    | 256 (46.1)               | 219 (35.9)            |
| <b>Study Center</b>    |                          |                       |
| Detroit                | 56 (10.1)                | 73 (12.0)             |
| Iowa                   | 225 (40.5)               | 235 (38.5)            |
| Los Angeles            | 71 (12.8)                | 96 (15.7)             |
| Seattle                | 203 (36.6)               | 206 (33.8)            |
| <b>Education</b>       |                          |                       |
| <12 years              | 47 (8.5)                 | 43 (7.0)              |
| 12-15 years            | 326 (58.7)               | 400 (65.6)            |
| 16+ years              | 182 (32.8)               | 167 (27.4)            |
| <b>NHL Subtype</b>     |                          |                       |
| DLBCL                  | -                        | 171 (28.0)            |
| Follicular             | -                        | 168 (27.5)            |
| CLL/SLL                | -                        | 86 (14.1)             |
| Marginal zone          | -                        | 50 (8.2)              |
| Mantle cell            | -                        | 27 (4.4)              |
| Mycosis                |                          |                       |
| Fungoides              | -                        | 14 (2.3)              |
| Burkitt                | -                        | 10 (1.6)              |
| Peripheral T           | -                        | 8 (1.3)               |
| T/NK-other             | -                        | 17 (2.8)              |
| NOS                    | -                        | 59 (9.7)              |

*Abbreviations:*

*NHL, non-Hodgkin lymphoma*

*NCI, National Cancer Institute*

*SEER, Surveillance, Epidemiology and End Results*

*HLA, human leukocyte antigen*

*DLBCL, diffuse large B-cell lymphoma*

*CLL/SLL, chronic lymphocytic leukemia/small lymphocytic lymphoma*

*NK, natural killer*

*NOS, not otherwise specified*
