# Supplementary material
Source: PubMed Central journal article supplement (PMC2890176)
Supplement: blood-2010-01-266775_2.pdf [file blood-2010-01-266775_2.pdf]

| HLA-A Alleles | Controls (n=1070) |        | NHL (n=1154) |        | DLBCL (n=330) |        | Follicular (n=324) |        |
|---------------|-------------------|--------|--------------|--------|---------------|--------|--------------------|--------|
|               | N                 | AF     | N            | AF     | N             | AF     | N                  | AF     |
| 0101          | 180               | 0.1682 | 202          | 0.1750 | 64            | 0.1939 | 56                 | 0.1728 |
| 0102          | 1                 | 0.0009 | 0            | .      | 0             | .      | 0                  | .      |
| 0201          | 315               | 0.2944 | 352          | 0.3050 | 109           | 0.3303 | 94                 | 0.2901 |
| 0202          | 1                 | 0.0009 | 4            | 0.0035 | 1             | 0.0030 | 0                  | .      |
| 0203          | 1                 | 0.0009 | 0            | .      | 0             | .      | 0                  | .      |
| 0205          | 8                 | 0.0075 | 10           | 0.0087 | 5             | 0.0152 | 3                  | 0.0093 |
| 0206          | 4                 | 0.0037 | 6            | 0.0052 | 1             | 0.0030 | 2                  | 0.0062 |
| 0217          | 1                 | 0.0009 | 2            | 0.0017 | 0             | .      | 1                  | 0.0031 |
| 0220          | 0                 | .      | 1            | 0.0009 | 0             | .      | 0                  | .      |
| 0222          | 2                 | 0.0019 | 0            | .      | 0             | .      | 0                  | .      |
| 0234          | 0                 | .      | 1            | 0.0009 | .             | .      | 1                  | 0.0031 |
| 0301          | 148               | 0.1383 | 150          | 0.1300 | 37            | 0.1121 | 45                 | 0.1389 |
| 0302          | 2                 | 0.0019 | 7            | 0.0061 | 0             | .      | 3                  | 0.0093 |
| 1101          | 60                | 0.0561 | 60           | 0.0520 | 16            | 0.0485 | 16                 | 0.0494 |
| 2011          | 1                 | 0.0009 | 0            | .      | 0             | .      | 0                  | .      |
| 2301          | 14                | 0.0131 | 16           | 0.0139 | 5             | 0.0152 | 3                  | 0.0093 |
| 2402          | 102               | 0.0953 | 92           | 0.0797 | 28            | 0.0849 | 26                 | 0.0803 |
| 2403          | 2                 | 0.0019 | 2            | 0.0017 | 1             | 0.0030 | 0                  | .      |
| 2501          | 19                | 0.0178 | 22           | 0.0191 | 7             | 0.0212 | 7                  | 0.0216 |
| 2601          | 24                | 0.0224 | 50           | 0.0433 | 16            | 0.0485 | 12                 | 0.0370 |
| 2608          | 0                 | .      | 2            | 0.0017 | 1             | 0.0030 | 0                  | .      |
| 2901          | 3                 | 0.0028 | 1            | 0.0009 | 0             | .      | 1                  | 0.0031 |
| 2902          | 42                | 0.0393 | 32           | 0.0277 | 6             | 0.0182 | 11                 | 0.0340 |
| 3001          | 17                | 0.0159 | 14           | 0.0121 | 2             | 0.0061 | 4                  | 0.0124 |
| 3002          | 4                 | 0.0037 | 6            | 0.0050 | 2             | 0.0061 | 2                  | 0.0062 |
| 3003          | 0                 | .      | 1            | 0.0009 | 0             | .      | 1                  | 0.0031 |
| 3004          | 5                 | 0.0047 | 3            | 0.0026 | 0             | .      | 1                  | 0.0031 |
| 3101          | 22                | 0.0206 | 28           | 0.0243 | 6             | 0.0182 | 8                  | 0.0247 |
| 3201          | 28                | 0.0262 | 31           | 0.0269 | 9             | 0.0273 | 8                  | 0.0247 |
| 3301          | 10                | 0.0094 | 5            | 0.0043 | 0             | .      | 3                  | 0.0093 |
| 3303          | 7                 | 0.0065 | 4            | 0.0035 | 1             | 0.0030 | 1                  | 0.0031 |
| 3402          | 0                 | .      | 2            | 0.0017 | 1             | 0.0030 | 1                  | 0.0031 |
| 3601          | 0                 | .      | 1            | 0.0009 | 0             | .      | 1                  | 0.0031 |
| 6601          | 4                 | 0.0037 | 3            | 0.0026 | 0             | .      | 0                  | .      |
| 6801          | 32                | 0.0299 | 28           | 0.0243 | 8             | 0.0242 | 8                  | 0.0247 |
| 6802          | 7                 | 0.0065 | 9            | 0.0078 | 3             | 0.0091 | 2                  | 0.0062 |
| 6803          | 0                 | .      | 1            | 0.0009 | 1             | 0.0030 | 0                  | .      |
| 6901          | 1                 | 0.0009 | 3            | 0.0026 | 0             | .      | 2                  | 0.0062 |
| 7401          | 1                 | 0.0009 | 1            | 0.0009 | 0             | .      | 1                  | 0.0031 |
| 7403          | 0                 | .      | 1            | 0.0009 | 0             | .      | 0                  | .      |
| 7406          | 0                 | .      | 1            | 0.0009 | 0             | .      | 0                  | .      |
| 8001          | 2                 | 0.0019 | 0            | .      | 0             | .      | 0                  | .      |

Abbreviations: AF, allele frequency; DLBCL, diffuse large B-cell lymphoma; HLA, human leukocyte antigen; SEER, surveillance, epidemiology and end result

| HLA-B Alleles | Controls (n=1074) |        | NHL (n=1160) |        | DLBCL (n=330) |        | Follicular (n=326) |        |
|---------------|-------------------|--------|--------------|--------|---------------|--------|--------------------|--------|
|               | N                 | AF     | N            | AF     | N             | AF     | N                  | AF     |
| 0702          | 137               | 0.1276 | 142          | 0.1224 | 37            | 0.1121 | 40                 | 0.1227 |
| 0705          | 2                 | 0.0019 | 2            | 0.0017 | 0             | .      | 1                  | 0.0031 |
| 0708          | 1                 | 0.0009 | 0            | .      | 0             | .      | 0                  | .      |
| 0801          | 108               | 0.1006 | 159          | 0.1371 | 52            | 0.1576 | 44                 | 0.1350 |
| 1301          | 1                 | 0.0009 | 1            | 0.0009 | 0             | .      | 0                  | .      |
| 1302          | 27                | 0.0251 | 28           | 0.0241 | 6             | 0.0182 | 8                  | 0.0245 |
| 1401          | 8                 | 0.0075 | 9            | 0.0078 | 3             | 0.0091 | 5                  | 0.0153 |
| 1402          | 36                | 0.0335 | 28           | 0.0241 | 9             | 0.0273 | 9                  | 0.0276 |
| 1501          | 73                | 0.0680 | 62           | 0.0535 | 20            | 0.0606 | 12                 | 0.0368 |
| 1503          | 1                 | 0.0009 | 1            | 0.0009 | 0             | .      | 0                  | .      |
| 1507          | 1                 | 0.0009 | 0            | .      | 0             | .      | 0                  | .      |
| 1510          | 2                 | 0.0019 | 0            | .      | 0             | .      | 0                  | .      |
| 1516          | 2                 | 0.0019 | 0            | .      | 0             | .      | 0                  | .      |
| 1517          | 3                 | 0.0028 | 7            | 0.0060 | 1             | 0.0030 | 2                  | 0.0061 |
| 1518          | 4                 | 0.0037 | 0            | .      | 0             | .      | 0                  | .      |
| 1524          | 2                 | 0.0019 | 1            | 0.0009 | 0             | .      | 0                  | .      |
| 1801          | 44                | 0.0410 | 55           | 0.0474 | 16            | 0.0485 | 11                 | 0.0337 |
| 1803          | 1                 | 0.0009 | 4            | 0.0035 | 1             | 0.0030 | 0                  | .      |
| 2702          | 3                 | 0.0028 | 2            | 0.0017 | 1             | 0.0030 | 0                  | .      |
| 2703          | 1                 | 0.0009 | 0            | .      | 0             | .      | 0                  | .      |
| 2705          | 42                | 0.0391 | 45           | 0.0388 | 12            | 0.0364 | 14                 | 0.0429 |
| 3501          | 77                | 0.0717 | 63           | 0.0543 | 21            | 0.0636 | 23                 | 0.0706 |
| 3502          | 5                 | 0.0047 | 6            | 0.0052 | 1             | 0.0030 | 1                  | 0.0031 |
| 3503          | 27                | 0.0251 | 13           | 0.0112 | 4             | 0.0121 | 1                  | 0.0031 |
| 3504          | 2                 | 0.0019 | 4            | 0.0035 | 1             | 0.0030 | 0                  | .      |
| 3508          | 5                 | 0.0047 | 5            | 0.0043 | 2             | 0.0061 | 2                  | 0.0061 |
| 3528          | 1                 | 0.0009 | 0            | .      | 0             | .      | 0                  | .      |
| 3701          | 19                | 0.0177 | 15           | 0.0129 | 4             | 0.0121 | 8                  | 0.0245 |
| 3702          | 0                 | .      | 1            | 0.0009 | 0             | .      | 1                  | 0.0031 |
| 3801          | 19                | 0.0177 | 22           | 0.0190 | 9             | 0.0273 | 5                  | 0.0153 |
| 3901          | 7                 | 0.0065 | 14           | 0.0121 | 5             | 0.0152 | 6                  | 0.0184 |
| 3903          | 1                 | 0.0009 | 0            | .      | 0             | .      | 0                  | .      |
| 3906          | 5                 | 0.0047 | 6            | 0.0052 | 1             | 0.0030 | 0                  | .      |
| 4001          | 76                | 0.0708 | 71           | 0.0612 | 16            | 0.0485 | 17                 | 0.0522 |
| 4002          | 11                | 0.0102 | 14           | 0.0121 | 4             | 0.0121 | 4                  | 0.0123 |
| 4101          | 5                 | 0.0047 | 9            | 0.0078 | 3             | 0.0091 | 3                  | 0.0092 |
| 4102          | 4                 | 0.0037 | 3            | 0.0026 | 0             | .      | 0                  | .      |
| 4402          | 92                | 0.0857 | 108          | 0.0931 | 27            | 0.0818 | 30                 | 0.0920 |
| 4403          | 61                | 0.0568 | 58           | 0.0500 | 16            | 0.0485 | 17                 | 0.0522 |
| 4404          | 1                 | 0.0009 | 1            | 0.0009 | 1             | 0.0030 | 0                  | .      |
| 4405          | 2                 | 0.0019 | 2            | 0.0017 | 0             | .      | 1                  | 0.0031 |
| 4501          | 3                 | 0.0028 | 5            | 0.0043 | 2             | 0.0061 | 0                  | .      |
| 4701          | 3                 | 0.0028 | 5            | 0.0043 | 1             | 0.0030 | 3                  | 0.0092 |
| 4801          | 1                 | 0.0009 | 2            | 0.0017 | 0             | .      | 1                  | 0.0031 |
| 4901          | 17                | 0.0158 | 19           | 0.0164 | 6             | 0.0182 | 4                  | 0.0123 |
| 5001          | 7                 | 0.0065 | 12           | 0.0103 | 6             | 0.0182 | 2                  | 0.0061 |
| 5002          | 1                 | 0.0009 | 0            | .      | 0             | .      | 0                  | .      |
| 5101          | 42                | 0.0391 | 62           | 0.0535 | 23            | 0.0697 | 17                 | 0.0522 |
| 5102          | 2                 | 0.0019 | 1            | 0.0009 | 0             | .      | 1                  | 0.0031 |
| 5108          | 1                 | 0.0009 | 0            | .      | 0             | .      | 0                  | .      |
| 5201          | 7                 | 0.0065 | 12           | 0.0103 | 3             | 0.0091 | 3                  | 0.0092 |
| 5301          | 3                 | 0.0028 | 4            | 0.0035 | 1             | 0.0030 | 2                  | 0.0061 |
| 5401          | 0                 | .      | 1            | 0.0009 | 0             | .      | 0                  | .      |
| 5501          | 13                | 0.0121 | 19           | 0.0164 | 1             | 0.0030 | 7                  | 0.0215 |
| 5601          | 3                 | 0.0028 | 5            | 0.0043 | 1             | 0.0030 | 1                  | 0.0031 |
| 5701          | 39                | 0.0363 | 42           | 0.0362 | 12            | 0.0364 | 17                 | 0.0522 |
| 5702          | 1                 | 0.0009 | 2            | 0.0017 | 1             | 0.0030 | 0                  | .      |
| 5703          | 0                 | .      | 3            | 0.0026 | 0             | .      | 1                  | 0.0031 |
| 5801          | 11                | 0.0102 | 5            | 0.0043 | 0             | .      | 2                  | 0.0061 |
| 7802          | 1                 | 0.0009 | 0            | .      | 0             | .      | 0                  | .      |

Abbreviations: AF, allele frequency; DLBCL, diffuse large B-cell lymphoma; HLA, human leukocyte antigen;

| HLA-C Alleles | Controls (n=1070) |        | NHL (n=1162) |        | DLBCL (n=332) |        | Follicular (n=326) |        |
|---------------|-------------------|--------|--------------|--------|---------------|--------|--------------------|--------|
|               | N                 | AF     | N            | AF     | N             | AF     | N                  | AF     |
| 0102          | 27                | 0.0252 | 28           | 0.0241 | 8             | 0.0241 | 6                  | 0.0184 |
| 0201          | 1                 | 0.0009 | 0            | .      | 0             | .      | 0                  | .      |
| 0202          | 39                | 0.0365 | 51           | 0.0439 | 15            | 0.0452 | 18                 | 0.0552 |
| 0302          | 4                 | 0.0037 | 1            | 0.0009 | 0             | .      | 1                  | 0.0031 |
| 0303          | 49                | 0.0458 | 53           | 0.0456 | 14            | 0.0422 | 13                 | 0.0399 |
| 0304          | 107               | 0.1000 | 99           | 0.0852 | 23            | 0.0693 | 23                 | 0.0706 |
| 0307          | 0                 | .      | 1            | 0.0009 | 1             | 0.0030 | 32                 | 0.0982 |
| 0401          | 135               | 0.1262 | 117          | 0.1007 | 40            | 0.1205 | 0                  | .      |
| 0404          | 1                 | 0.0009 | 0            | .      | 0             | .      | 0                  | .      |
| 0501          | 91                | 0.0851 | 102          | 0.0878 | 23            | 0.0693 | 30                 | 0.0920 |
| 0602          | 99                | 0.0925 | 109          | 0.0938 | 33            | 0.0994 | 38                 | 0.1166 |
| 0701          | 162               | 0.1514 | 220          | 0.1893 | 70            | 0.2108 | 58                 | 0.1779 |
| 0702          | 144               | 0.1346 | 148          | 0.1274 | 38            | 0.1145 | 39                 | 0.1196 |
| 0704          | 21                | 0.0196 | 18           | 0.0155 | 7             | 0.0211 | 4                  | 0.0123 |
| 0705          | 0                 | .      | 1            | 0.0009 | 0             | .      | 0                  | .      |
| 0801          | 1                 | 0.0009 | 2            | 0.0017 | 0             | .      | 1                  | 0.0031 |
| 0802          | 41                | 0.0383 | 37           | 0.0318 | 12            | 0.0361 | 13                 | 0.0399 |
| 1202          | 6                 | 0.0056 | 11           | 0.0095 | 2             | 0.0060 | 3                  | 0.0092 |
| 1203          | 46                | 0.0430 | 57           | 0.0491 | 18            | 0.0542 | 16                 | 0.0491 |
| 1402          | 14                | 0.0131 | 16           | 0.0138 | 6             | 0.0181 | 5                  | 0.0153 |
| 1403          | 1                 | 0.0009 | 0            | .      | 0             | .      | 0                  | .      |
| 1502          | 15                | 0.0140 | 29           | 0.0250 | 12            | 0.0361 | 6                  | 0.0184 |
| 1505          | 3                 | 0.0028 | 2            | 0.0017 | 0             | .      | 1                  | 0.0031 |
| 1601          | 47                | 0.0439 | 44           | 0.0379 | 7             | 0.0211 | 16                 | 0.0491 |
| 1602          | 5                 | 0.0047 | 3            | 0.0026 | 0             | .      | 0                  | .      |
| 1604          | 1                 | 0.0009 | 2            | 0.0017 | 1             | 0.0030 | 1                  | 0.0031 |
| 1701          | 9                 | 0.0084 | 10           | 0.0086 | 2             | 0.0060 | 2                  | 0.0061 |
| 1801          | 1                 | 0.0009 | 1            | 0.0009 | 0             | .      | 0                  | .      |

Abbreviations: AF, allele frequency; DLBCL, diffuse large B-cell lymphoma; HLA, human leukocyte antigen;

| HLA-DR Alleles | Controls (n=1040) |        | NHL (n=1100) |        | DLBCL (n=306) |        | Follicular (n=302) |        |
|----------------|-------------------|--------|--------------|--------|---------------|--------|--------------------|--------|
|                | N                 | AF     | N            | AF     | N             | AF     | N                  | AF     |
| 0101           | 90                | 0.0865 | 119          | 0.1082 | 31            | 0.1013 | 50                 | 0.1656 |
| 0102           | 21                | 0.0202 | 18           | 0.0164 | 8             | 0.0261 | 3                  | 0.0099 |
| 0103           | 20                | 0.0192 | 10           | 0.0091 | 3             | 0.0098 | 3                  | 0.0099 |
| 0301           | 108               | 0.1039 | 160          | 0.1455 | 50            | 0.1634 | 41                 | 0.1358 |
| 0302           | 1                 | 0.0010 | 0            | .      | 0             | .      | 0                  | .      |
| 0305           | 1                 | 0.0010 | 0            | .      | 0             | .      | 0                  | .      |
| 0401           | 108               | 0.1039 | 94           | 0.0855 | 17            | 0.0556 | 34                 | 0.1126 |
| 0402           | 4                 | 0.0039 | 14           | 0.0127 | 7             | 0.0229 | 3                  | 0.0099 |
| 0403           | 5                 | 0.0048 | 15           | 0.0136 | 3             | 0.0098 | 5                  | 0.0166 |
| 0404           | 49                | 0.0471 | 44           | 0.0400 | 19            | 0.0620 | 7                  | 0.0232 |
| 0405           | 2                 | 0.0019 | 6            | 0.0055 | 2             | 0.0065 | 1                  | 0.0033 |
| 0406           | 1                 | 0.0010 | 0            | .      | 0             | .      | 0                  | .      |
| 0407           | 16                | 0.0154 | 15           | 0.0136 | 3             | 0.0098 | 3                  | 0.0099 |
| 0408           | 6                 | 0.0058 | 11           | 0.0100 | 4             | 0.0131 | 4                  | 0.0133 |
| 0410           | 1                 | 0.0010 | 1            | 0.0009 | 0             | .      | 0                  | .      |
| 0411           | 0                 | .      | 1            | 0.0009 | 0             | .      | 1                  | 0.0033 |
| 0450           | 0                 | .      | 1            | 0.0009 | 1             | 0.0033 | 0                  | .      |
| 0701           | 131               | 0.1260 | 130          | 0.1182 | 33            | 0.1078 | 42                 | 0.1391 |
| 0801           | 29                | 0.0279 | 25           | 0.0227 | 8             | 0.0261 | 6                  | 0.0199 |
| 0802           | 3                 | 0.0029 | 1            | 0.0009 | 0             | .      | 0                  | .      |
| 0803           | 1                 | 0.0010 | 7            | 0.0064 | 1             | 0.0033 | 1                  | 0.0033 |
| 0804           | 3                 | 0.0029 | 2            | 0.0018 | 0             | .      | 1                  | 0.0033 |
| 0810           | 1                 | 0.0010 | 0            | .      | 0             | .      | 0                  | .      |
| 0811           | 1                 | 0.0010 | 0            | .      | 0             | .      | 0                  | .      |
| 0901           | 11                | 0.0106 | 8            | 0.0073 | 3             | 0.0098 | 2                  | 0.0066 |
| 1001           | 8                 | 0.0077 | 10           | 0.0091 | 3             | 0.0098 | 3                  | 0.0099 |
| 1101           | 51                | 0.0490 | 57           | 0.0518 | 17            | 0.0556 | 12                 | 0.0397 |
| 1102           | 4                 | 0.0039 | 1            | 0.0009 | 0             | .      | 1                  | 0.0033 |
| 1103           | 8                 | 0.0077 | 5            | 0.0046 | 1             | 0.0033 | 1                  | 0.0033 |
| 1104           | 24                | 0.0231 | 24           | 0.0218 | 10            | 0.0327 | 4                  | 0.0133 |
| 1112           | 1                 | 0.0010 | 0            | .      | 0             | .      | 0                  | .      |
| 1201           | 18                | 0.0173 | 18           | 0.0164 | 6             | 0.0196 | 4                  | 0.0133 |
| 1301           | 58                | 0.0558 | 46           | 0.0418 | 11            | 0.0360 | 6                  | 0.0199 |
| 1302           | 54                | 0.0519 | 44           | 0.0400 | 14            | 0.0458 | 9                  | 0.0298 |
| 1303           | 13                | 0.0125 | 8            | 0.0073 | 1             | 0.0033 | 3                  | 0.0099 |
| 1304           | 0                 | .      | 1            | 0.0009 | 0             | .      | 0                  | .      |
| 1305           | 3                 | 0.0029 | 3            | 0.0027 | 1             | 0.0033 | 1                  | 0.0033 |
| 1310           | 0                 | .      | 1            | 0.0009 | 0             | .      | 0                  | .      |
| 1401           | 20                | 0.0192 | 25           | 0.0227 | 2             | 0.0065 | 8                  | 0.0265 |
| 1402           | 0                 | .      | 1            | 0.0009 | 0             | .      | 1                  | 0.0033 |
| 1407           | 2                 | 0.0019 | 1            | 0.0009 | 0             | .      | 0                  | .      |
| 1501           | 145               | 0.1394 | 149          | 0.1355 | 37            | 0.1209 | 38                 | 0.1258 |
| 1502           | 8                 | 0.0077 | 7            | 0.0064 | 3             | 0.0098 | 0                  | .      |
| 1503           | 1                 | 0.0010 | 0            | .      | 0             | .      | 0                  | .      |
| 1510           | 1                 | 0.0010 | 0            | .      | 0             | .      | 0                  | .      |
| 1511           | 1                 | 0.0010 | 0            | .      | 0             | .      | 0                  | .      |
| 1601           | 7                 | 0.0067 | 15           | 0.0136 | 6             | 0.0196 | 3                  | 0.0099 |
| 1602           | 0                 | .      | 2            | 0.0018 | 1             | 0.0033 | 1                  | 0.0033 |

Abbreviations: AF, allele frequency; DLBCL, diffuse large B-cell lymphoma; HLA, human leukocyte antigen;
