# Supplementary material
Source: PubMed Central journal article supplement (PMC2890176)
Supplement: blood-2010-01-266775_3.pdf [file blood-2010-01-266775_3.pdf]

|                                              |         | Controls |      | NHL |      | DLBCL            |     | Follicular |                          |     |      |                  |
|----------------------------------------------|---------|----------|------|-----|------|------------------|-----|------------|--------------------------|-----|------|------------------|
|                                              |         | n        | (%)  | n   | (%)  | OR (95% CI)      | n   | (%)        | OR (95% CI)              | n   | (%)  | OR (95% CI)      |
| <b>HLA-A</b>                                 | No      | 545      | (85) | 572 | (84) | 1.00 (referent)  | 157 | (84)       | 1.00 (referent)          | 161 | (89) | 1.00 (referent)  |
|                                              | Yes     | 94       | (15) | 105 | (16) | 1.04 (0.77-1.41) | 30  | (6)        | 1.07 (0.78-1.68)         | 20  | (11) | 0.69 (0.41-1.16) |
| <b>HLA-B</b>                                 | No      | 606      | (94) | 629 | (93) | 1.00 (referent)  | 169 | (90)       | 1.00 (referent)          | 169 | (92) | 1.00 (referent)  |
|                                              | Yes     | 36       | (6)  | 50  | (7)  | 1.27 (0.82-1.99) | 18  | (10)       | <b>1.81 (0.99-3.28)</b>  | 14  | (8)  | 1.35 (0.70-2.59) |
| <b>HLA-C</b>                                 | No      | 585      | (91) | 603 | (88) | 1.00 (referent)  | 165 | (88)       | 1.00 (referent)          | 162 | (89) | 1.00 (referent)  |
|                                              | Yes     | 56       | (9)  | 80  | (12) | 1.32 (0.92-1.90) | 23  | (12)       | 1.47 (0.87-2.47)         | 21  | (11) | 1.30 (0.75-2.24) |
| <b># Class I loci<br/>(HLA-A, -B, or -C)</b> | 0 or 1  | 604      | (96) | 622 | (93) | 1.00 (referent)  | 169 | (91)       | 1.00 (referent)          | 168 | (93) | 1.00 (referent)  |
|                                              | 2       | 21       | (3)  | 38  | (6)  | 1.65 (0.96-2.86) | 11  | (6)        | 1.91 (0.89-4.08)         | 10  | (6)  | 1.55 (0.70-3.42) |
|                                              | 3       | 6        | (1)  | 12  | (1)  | 1.82 (0.71-5.18) | 6   | (3)        | <b>3.63 (1.15-11.57)</b> | 3   | (1)  | 1.77 (0.42-7.42) |
|                                              | p-trend |          |      |     |      | <b>0.03</b>      |     |            | <b>0.007</b>             |     |      | 0.2              |

Abbreviations: HLA, human leukocyte antigen; NHL, non-Hodgkin lymphoma; DLBCL, diffuse large B-cell lymphoma; OR, odds ratio; CI, confidence intervals; ref, referent
